# Supplementary material for: Clinicopathological and prognostic significance of osteopontin expression in patients with prostate cancer: a systematic review and meta-analysis
Source: PubMed Central journal article supplement (PMC8350436; doi:10.1042/bsr20203531), 2021-08-05
Supplement: BSR-2020-3531_supp.pdf [file BSR-2020-3531_supp.pdf]

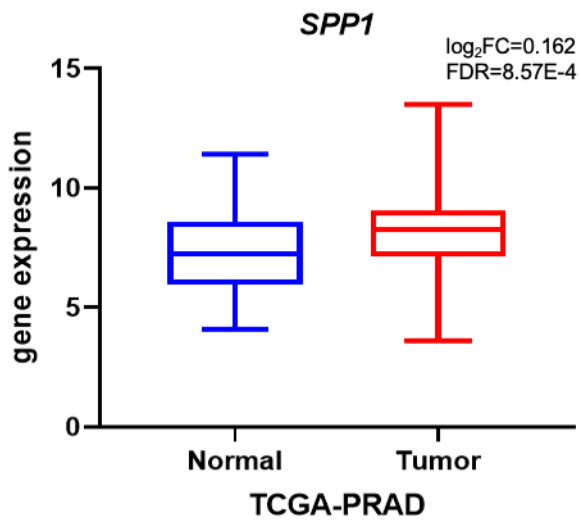

**Supplementary Material**

**Figure S1. Box plot of *SPP1* expression between normal prostate samples and prostate cancer samples in TCGA database.**
